# Supplementary material for: Cost-effectiveness of enzyme replacement therapy with alglucosidase alfa in adult patients with Pompe disease
Source: Springer Nature journal article supplement (doi:10.1186/s13023-017-0731-0), 2017-12-01
Supplement: MOESM1 [file 15304988]

Table S1 Survival: Cox regression estimates

| Time dependent Cox regression estimates ERT=0 |      |                     |                |                     |                |
|-----------------------------------------------|------|---------------------|----------------|---------------------|----------------|
|                                               | Year | No ventilation      |                | Ventilation         |                |
|                                               |      | Cumulative survival | Standard error | Cumulative survival | Standard error |
| No ambulation                                 | 0    | 1.000               | 0.000          | 1.000               | 0.000          |
|                                               | 1    | 0.997               | 0.002          | 0.994               | 0.005          |
|                                               | 2    | 0.985               | 0.006          | 0.965               | 0.015          |
|                                               | 3    | 0.975               | 0.009          | 0.944               | 0.022          |
|                                               | 4    | 0.965               | 0.012          | 0.921               | 0.029          |
|                                               | 5    | 0.951               | 0.017          | 0.891               | 0.040          |
|                                               | 6    | 0.919               | 0.027          | 0.825               | 0.063          |
|                                               | 7    | 0.900               | 0.034          | 0.785               | 0.076          |
|                                               | 8    | 0.871               | 0.045          | 0.728               | 0.094          |
|                                               | 9    | 0.845               | 0.058          | 0.679               | 0.117          |
| Ambulation                                    | 0    | 1.000               | 0.000          | 1.000               | 0.000          |
|                                               | 1    | 0.992               | 0.006          | 0.982               | 0.013          |
|                                               | 2    | 0.955               | 0.019          | 0.901               | 0.031          |
|                                               | 3    | 0.928               | 0.027          | 0.843               | 0.039          |
|                                               | 4    | 0.900               | 0.035          | 0.785               | 0.048          |
|                                               | 5    | 0.862               | 0.046          | 0.712               | 0.061          |
|                                               | 6    | 0.781               | 0.071          | 0.567               | 0.084          |
|                                               | 7    | 0.733               | 0.086          | 0.490               | 0.095          |
|                                               | 8    | 0.666               | 0.106          | 0.393               | 0.105          |
|                                               | 9    | 0.609               | 0.127          | 0.321               | 0.122          |
| Time dependent Cox regression estimates ERT=1 |      |                     |                |                     |                |
|                                               | Year | No ventilation      |                | Ventilation         |                |
|                                               |      | Cumulative survival | Standard error | Cumulative survival | Standard error |
| No ambulation                                 | 0    | 1.000               | 0.000          | 1.000               | 0.000          |
|                                               | 1    | 0.999               | 0.001          | 0.998               | 0.002          |
|                                               | 2    | 0.995               | 0.003          | 0.989               | 0.007          |
|                                               | 3    | 0.992               | 0.004          | 0.982               | 0.010          |
|                                               | 4    | 0.989               | 0.006          | 0.974               | 0.013          |
|                                               | 5    | 0.984               | 0.008          | 0.964               | 0.018          |
|                                               | 6    | 0.973               | 0.011          | 0.940               | 0.026          |
|                                               | 7    | 0.967               | 0.014          | 0.925               | 0.031          |
|                                               | 8    | 0.956               | 0.017          | 0.903               | 0.039          |
|                                               | 9    | 0.947               | 0.022          | 0.883               | 0.049          |
| Ambulation                                    | 0    | 1.000               | 0.000          | 1.000               | 0.000          |
|                                               | 1    | 0.998               | 0.002          | 0.994               | 0.005          |
|                                               | 2    | 0.985               | 0.008          | 0.967               | 0.015          |
|                                               | 3    | 0.976               | 0.012          | 0.947               | 0.023          |
|                                               | 4    | 0.967               | 0.016          | 0.925               | 0.029          |
|                                               | 5    | 0.953               | 0.021          | 0.897               | 0.036          |
|                                               | 6    | 0.923               | 0.031          | 0.833               | 0.047          |
|                                               | 7    | 0.905               | 0.034          | 0.795               | 0.052          |
|                                               | 8    | 0.877               | 0.045          | 0.740               | 0.059          |
|                                               | 9    | 0.852               | 0.056          | 0.693               | 0.075          |

**Table S2 Quality of life: regression estimates conceptual disease model**

| Coefficients quality of life model    |         |         |         |         |        |         |
|---------------------------------------|---------|---------|---------|---------|--------|---------|
|                                       | FVC     | MRC     | FSS     | RHS     | VAS    | Utility |
| Constant                              | 60.359* | 63.185* | 6.459*  | 24.887* | 6.903  | 0.580*  |
| Age                                   | -0.089  | 0.130   | 0.020   | -0.126* | 0.084  | 0.000   |
| Female                                | 13.688* | -0.033  | 0.384   | -1.551* | 3.413  | -0.011  |
| Disease duration                      | -0.184  | -0.257* | -0.067* | -0.035  | 0.512* | -0.006* |
| Enzyme activity                       | 0.952   | 0.924*  | 0.061   | -0.064  | -0.073 | -0.001  |
| FVC                                   |         |         | -0.008  | 0.079*  |        |         |
| MRC                                   |         |         | -0.024* | 0.120*  |        |         |
| FSS                                   |         |         |         | -0.721* |        |         |
| RHS                                   |         |         |         |         | 1.662* |         |
| VAS                                   |         |         |         |         |        | 0.003*  |
| ERT                                   | 0.118   | 1.370*  | -0.045  | -0.265  | 6.227* | 0.028*  |
| Standard errors quality of life model |         |         |         |         |        |         |
|                                       | FVC     | MRC     | FSS     | RHS     | VAS    | Utility |
| Constant                              | 10.421  | 5.052   | 1.128   | 2.917   | 10.294 | 0.097   |
| Age                                   | 0.175   | 0.085   | 0.011   | 0.027   | 0.107  | 0.001   |
| Female                                | 5.256   | 2.437   | 0.302   | 0.735   | 2.589  | 0.036   |
| Disease duration                      | 0.202   | 0.102   | 0.017   | 0.043   | 0.152  | 0.002   |
| Enzyme activity                       | 0.672   | 0.318   | 0.043   | 0.105   | 0.375  | 0.005   |
| FVC                                   |         |         | 0.006   | 0.014   |        |         |
| MRC                                   |         |         | 0.011   | 0.029   |        |         |
| FSS                                   |         |         |         | 0.135   |        |         |
| RHS                                   |         |         |         |         | 0.199  |         |
| VAS                                   |         |         |         |         |        | 0.000   |
| ERT                                   | 0.559   | 0.341   | 0.100   | 0.253   | 1.169  | 0.011   |

Abbreviations: FVC = Forced Vital Capacity; MRC = Medical Research Council; FSS = Fatigue Severity Scale; RHS = Rotterdam Handicap Scale; VAS = Visual Analogue Scale; ERT = Enzyme Replacement Therapy

\* Indicates significance at 0.05 level

**Table S3 Costs: regression estimates healthcare costs and productivity costs and input cost parameters**

| <b>Regression estimates healthcare costs and productivity costs model ST</b>  |                                |                                               |                  |                    |
|-------------------------------------------------------------------------------|--------------------------------|-----------------------------------------------|------------------|--------------------|
|                                                                               | Coefficients (log transformed) |                                               | Standard errors  |                    |
|                                                                               | Healthcare costs               | Productivity costs                            | Healthcare costs | Productivity costs |
| Constant                                                                      | 7.958*                         | 9.245                                         | 0.586            | 1.514              |
| Age                                                                           | 0.031*                         | -0.046                                        | 0.011            | 0.027              |
| Disease duration                                                              | 0.021                          | -0.102*                                       | 0.016            | 0.035              |
| Female                                                                        | -0.525                         | -0.734*                                       | 0.275            | 0.572              |
| <b>Regression estimates healthcare costs and productivity costs model ERT</b> |                                |                                               |                  |                    |
|                                                                               | Coefficients (log transformed) |                                               | Standard errors  |                    |
|                                                                               | Healthcare costs               | Productivity costs                            | Healthcare costs | Productivity costs |
| Constant                                                                      | 9.272*                         | 10.921*                                       | 0.536            | 2.048              |
| Age                                                                           | 0.002                          | -0.094*                                       | 0.009            | 0.037              |
| Disease duration                                                              | 0.045*                         | -0.050                                        | 0.011            | 0.026              |
| Female                                                                        | -0.457*                        | -0.213                                        | 0.222            | 0.683              |
| <b>Treatment costs: regression estimates patient's weight</b>                 |                                |                                               |                  |                    |
|                                                                               | Coefficients                   | Standard errors                               |                  |                    |
| Constant                                                                      | 58.148*                        | 2.592                                         |                  |                    |
| Age                                                                           | 0.493*                         | 0.031                                         |                  |                    |
| Female                                                                        | -13.360*                       | 2.803                                         |                  |                    |
| <b>Treatment cost: input parameters</b>                                       |                                |                                               |                  |                    |
|                                                                               | Values                         | Remarks                                       |                  |                    |
| ERT treatment costs / kilogram                                                | € 5,788                        | Dosage 20mg/kg; one infusion per two weeks    |                  |                    |
| <b>Costs of administration</b>                                                |                                |                                               |                  |                    |
| Costs of administration (per year)                                            | € 11,660                       | One infusion per two weeks                    |                  |                    |
| Home costs                                                                    | € 433                          | Source: bottom-up costing study (2014 prices) |                  |                    |
| Hospital costs                                                                | € 507                          | Source: bottom-up costing study (2014 prices) |                  |                    |
| Proportion treated in hospital                                                | 21%                            |                                               |                  |                    |

\* Indicates significance at 0.05 level

Figure S1 Double loop model structure

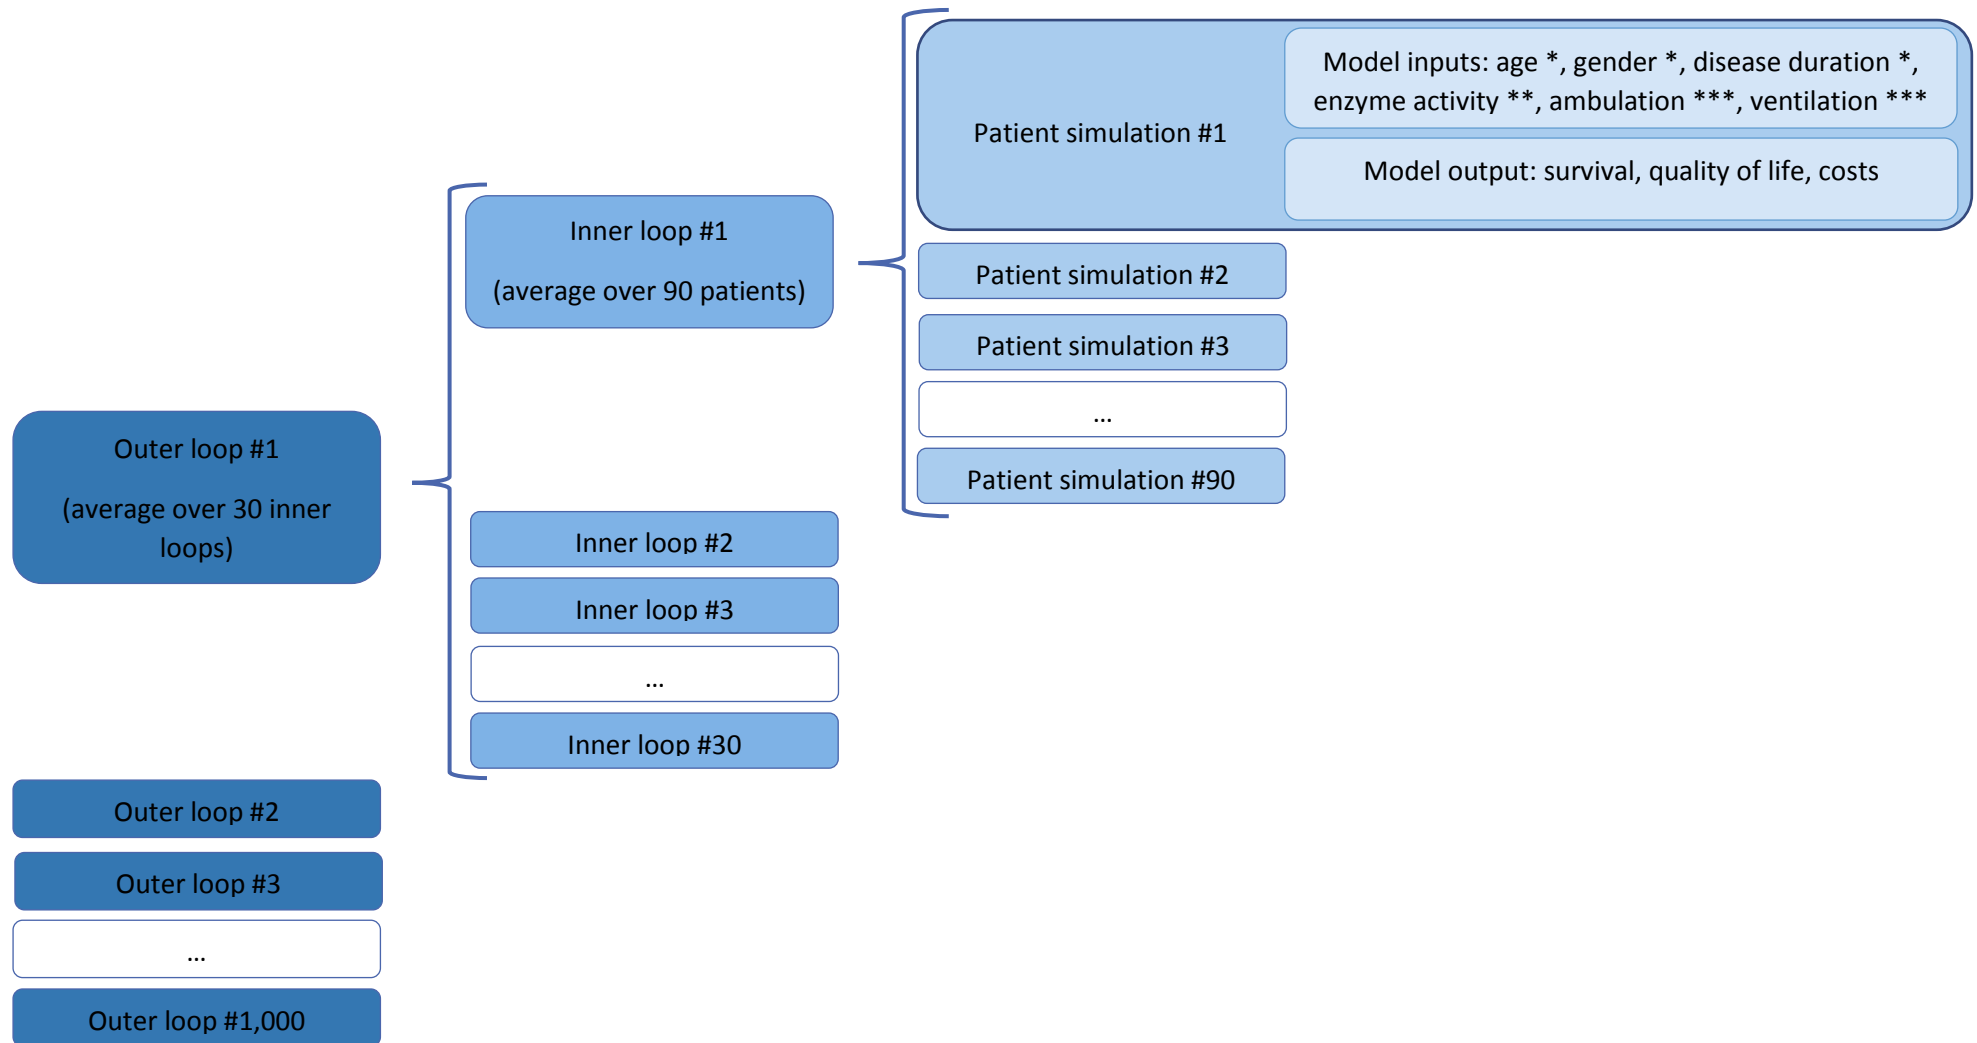

\* Used as input variable for costs and quality of life models; \*\* Used as input variable for quality of life model; \*\*\* Used as input variable for survival model
